# Supplementary material for: Poly-Saturated Dolichols from Filamentous Fungi Modulate Activity of Dolichol-Dependent Glycosyltransferase and Physical Properties of Membranes
Source: PubMed Central journal article supplement (PMC6628320; doi:10.3390/ijms20123043), 2019-06-21
Supplement: ijms-20-03043-s001.pdf [file ijms-20-03043-s001.pdf]

Table 1S

Molecular species of dolichols from *T. reesei* identified by mass spectrometry

| Compound  | Measured m/z [M+NH4] <sup>+</sup> | Calculated m/z [M+NH4] <sup>+</sup> | ΔM (ppm) | Molecular Formula [M+NH4] <sup>+</sup> |
|-----------|-----------------------------------|-------------------------------------|----------|----------------------------------------|
| Dol18     | 1263.1854                         | 1263.1874                           | -1.6     | C90H152NO                              |
| Dol18+2H  | 1265.2054                         | 1265.2030                           | 1.9      | C90H154NO                              |
| Dol18+4H  | 1267.2115                         | 1267.2187                           | -5.7     | C90H156NO                              |
| Dol18+6H  | 1269.2347                         | 1269.2343                           | 0.3      | C90H158NO                              |
| Dol18+8H  | 1271.2518                         | 1271.2500                           | 1.4      | C90H160NO                              |
| Dol18+10H | 1273.2626                         | 1273.2656                           | -2.4     | C90H162NO                              |
| Dol18+12H | 1275.2828                         | 1275.2813                           | 1.2      | C90H164NO                              |
| Dol18+14H | 1277.2969                         | 1277.2969                           | 0.0      | C90H166NO                              |
| Dol18+16H | 1279.3203                         | 1279.3126                           | 6.0      | C90H168NO                              |
| Dol19     | 1331.2476                         | 1331.2500                           | -1.8     | C95H160NO                              |
| Dol19+2H  | 1333.2733                         | 1333.2656                           | 5.8      | C95H162NO                              |
| Dol19+4H  | 1335.2847                         | 1335.2813                           | 2.5      | C95H164NO                              |
| Dol19+6H  | 1337.3055                         | 1337.2969                           | 6.4      | C95H166NO                              |
| Dol19+8H  | 1339.3120                         | 1339.3126                           | -0.4     | C95H168NO                              |
| Dol19+10H | 1341.3359                         | 1341.3282                           | 5.7      | C95H170NO                              |
| Dol19+12H | 1343.3453                         | 1343.3439                           | 1.0      | C95H172NO                              |
| Dol19+14H | 1345.3644                         | 1345.3595                           | 3.6      | C95H174NO                              |
| Dol19+16H | 1347.3768                         | 1347.3752                           | 1.2      | C95H176NO                              |
| Dol19+18H | 1349.3907                         | 1349.3908                           | -0.1     | C95H178NO                              |
| Dol19+20H | 1351.4063                         | 1351.4065                           | -0.1     | C95H180NO                              |
| Dol20     | 1399.3210                         | 1399.3126                           | 6.0      | C100H168NO                             |
| Dol20+2H  | 1401.3325                         | 1401.3282                           | 3.1      | C100H170NO                             |
| Dol20+4H  | 1403.3456                         | 1403.3439                           | 1.2      | C100H172NO                             |
| Dol20+6H  | 1405.3599                         | 1405.3595                           | 0.3      | C100H174NO                             |
| Dol20+8H  | 1407.3757                         | 1407.3752                           | 0.4      | C100H176NO                             |
| Dol20+10H | 1409.3931                         | 1409.3908                           | 1.6      | C100H178NO                             |
| Dol20+12H | 1411.4036                         | 1411.4065                           | -2.1     | C100H180NO                             |
| Dol20+14H | 1413.4319                         | 1413.4221                           | 6.9      | C100H182NO                             |
| Dol20+16H | 1415.4371                         | 1415.4378                           | -0.5     | C100H184NO                             |
| Dol20+18H | 1417.4601                         | 1417.4534                           | 4.7      | C100H186NO                             |
| Dol20+20H | 1419.4846                         | 1419.4691                           | 10.9     | C100H188NO                             |

Analysis was performed by LC-ESI-QTOF-MS [47]

Figure 1S

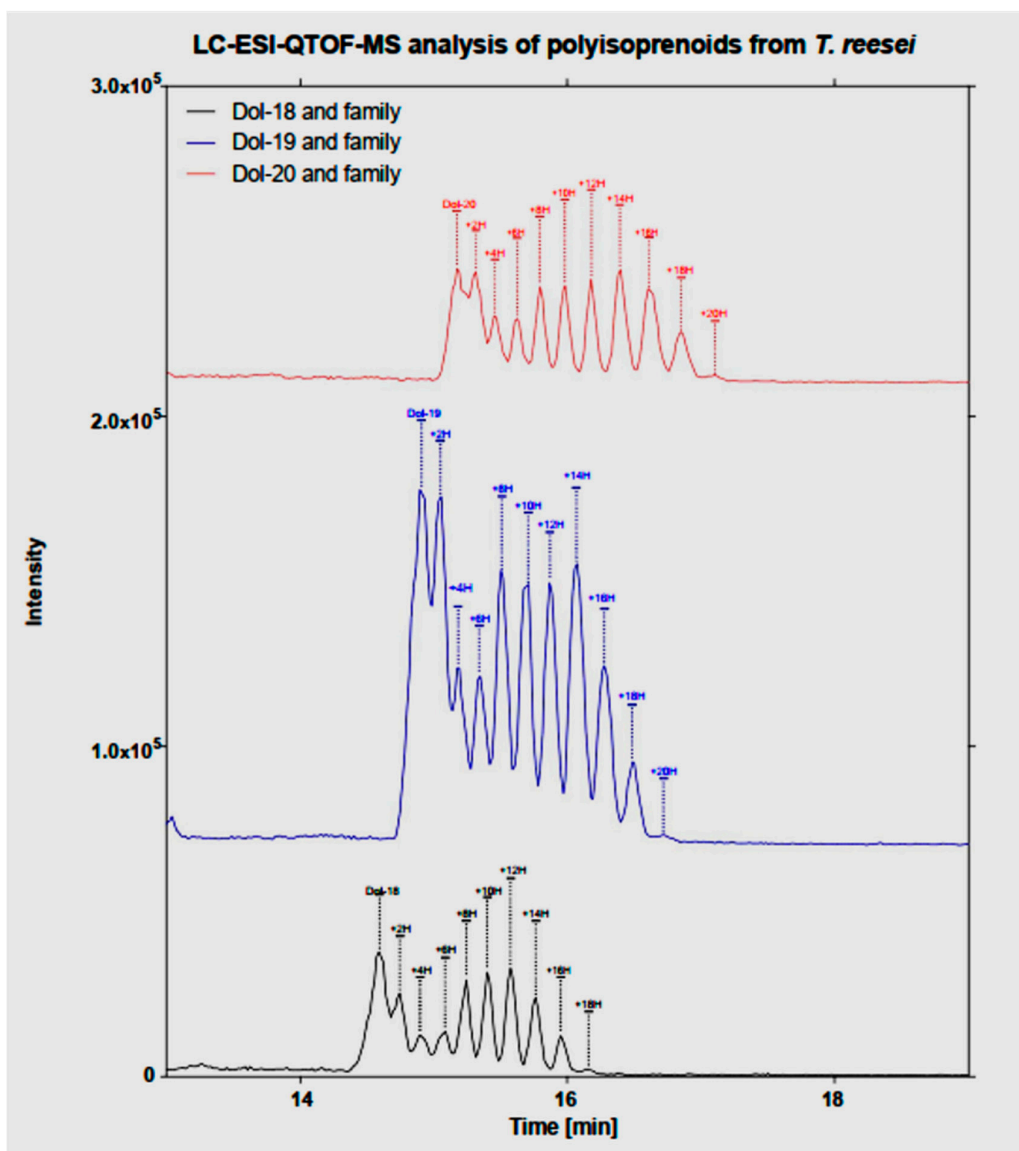

Table 2S

Continuous lines between points represent theoretical fits to the experimental data by applying equation:  $y = \text{Intercept} + B1 \cdot x^1 + B2 \cdot x^2$ . Parameters characterizing dependence of DPH fluorescence anisotropy on dolichol content obtained from the fitting are given in Table.

|                | Intercept |                | B1       |                | B2         |                | Statistics    |
|----------------|-----------|----------------|----------|----------------|------------|----------------|---------------|
|                | Value     | Standard Error | Value    | Standard Error | Value      | Standard Error | Adj. R-Square |
| TrDols_EYPC    | 0.21841   | 0.0013         | -0.00283 | 3.45726E-4     | 3.45926E-5 | 1.22683E-5     | 0.98629       |
| TrDols DPCC 20 | 0.2161    | 0.00544        | -0.00312 | 0.00166        | 7.7547E-5  | 6.12485E-5     | 0.97785       |

|                |         |            |            |            |             |            |         |
|----------------|---------|------------|------------|------------|-------------|------------|---------|
| TrDols DPPC 50 | 0.05437 | 8.69298E-4 | 6.73167E-4 | 2.76566E-4 | 1.53187E-6  | 8.89231E-6 | 0.96685 |
| ScDols_EYPC    | 0.21841 | 0.0013     | -0.00283   | 3.45726E-4 | 3.45926E-5  | 1.22683E-5 | 0.98629 |
| ScDols 20      | 0.21841 | 0.0013     | -0.00283   | 3.45726E-4 | 3.45926E-5  | 1.22683E-5 | 0.98629 |
| ScDols DPPC 50 | 0.05613 | 4.29571E-4 | 5.68912E-4 | 9.90187E-5 | -1.93783E-5 | 3.40209E-6 | 0.88717 |
